# Supplementary material
Source: PubMed Central journal article supplement (PMC2929116)
Supplement: tpc.109.072991_1.pdf [file tpc.109.072991_1.pdf]

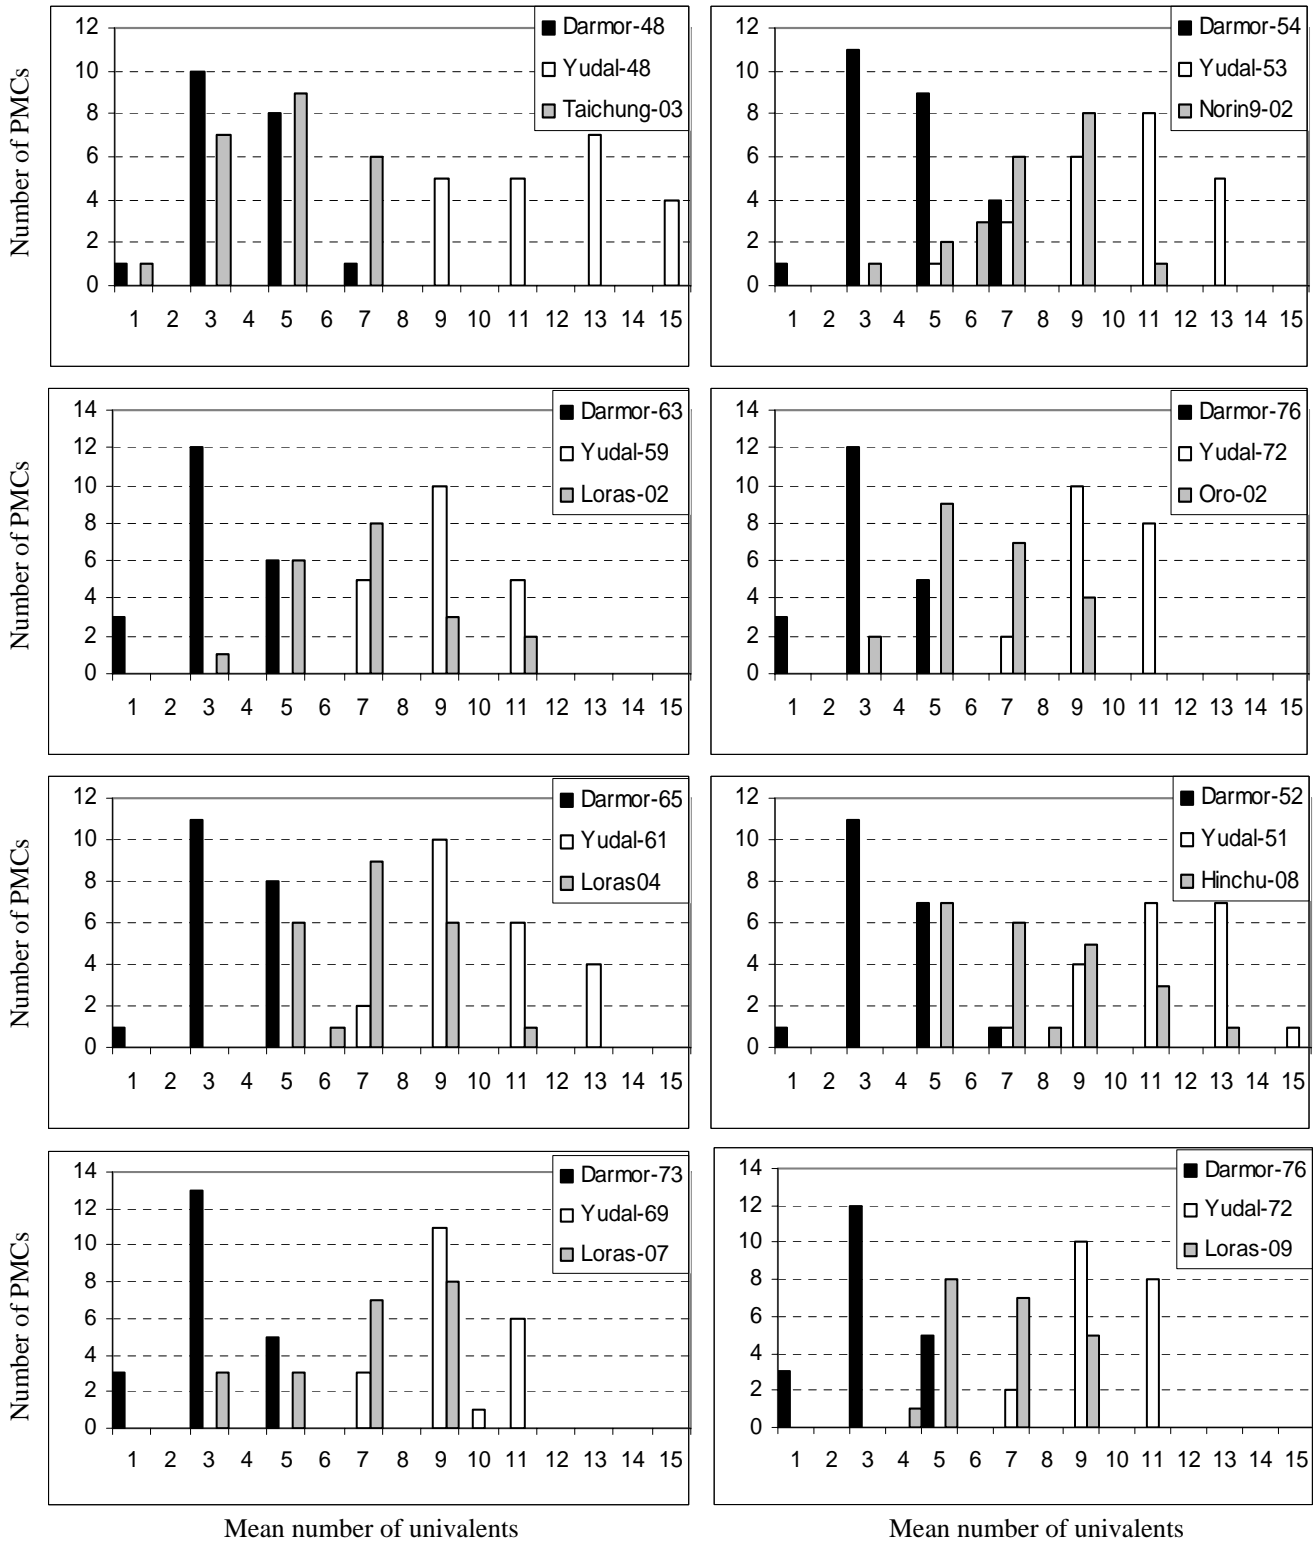

**Supplemental Figure 1:** Description of *B. napus* allohaploids showing an intermediate meiotic behavior. Grey histograms represent the frequency distributions of the number of univalents per Pollen Mother Cell (PMC) in allohaploids which showed an averaged intermediate meiotic behavior ( $6 < \text{mean \# univalents} < 8$ ). For comparison, the frequency distributions of the number of univalents per PMC in the *Darmor-bzh* and *Yudal* allohaploids closest in the greenhouse are shown by the black and white histograms, respectively. *Tai03*, *Oro02*, *Nor02* and *Hin08* are allohaploids isolated from accessions *Taichung*, *Oro*, *Norin9* and *Hincho*, respectively. *Lor02*, *Lor04*, *Lor07* and *Lor09* are four allohaploids isolated from the same accession *Loras*.

A

*Darmor-bzh* haploids (n=11)

*Drakkar* haploids (n=8)

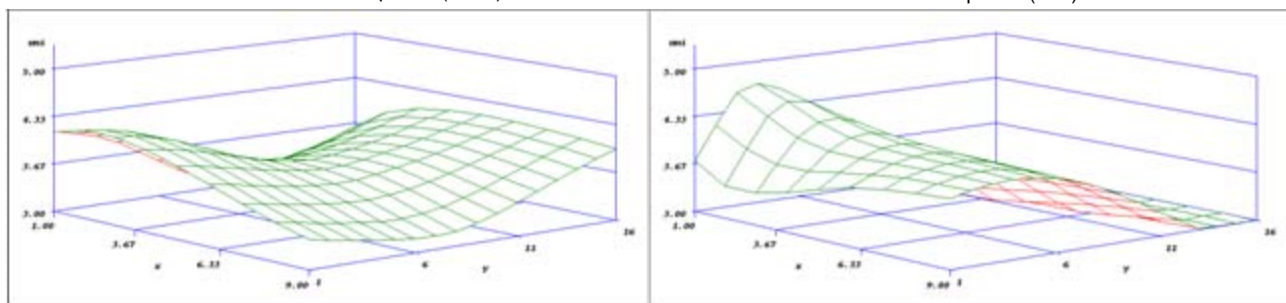

*Maxol* haploids (n=7)

*Stellar* haploids (n=8)

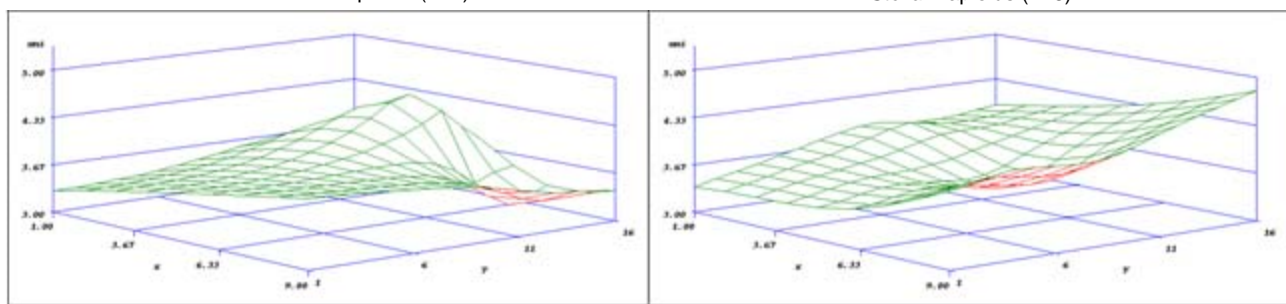

*Mohican* (plant n°3) haploids (n=7)

*Mohican* (plant n°4) haploids (n=8)

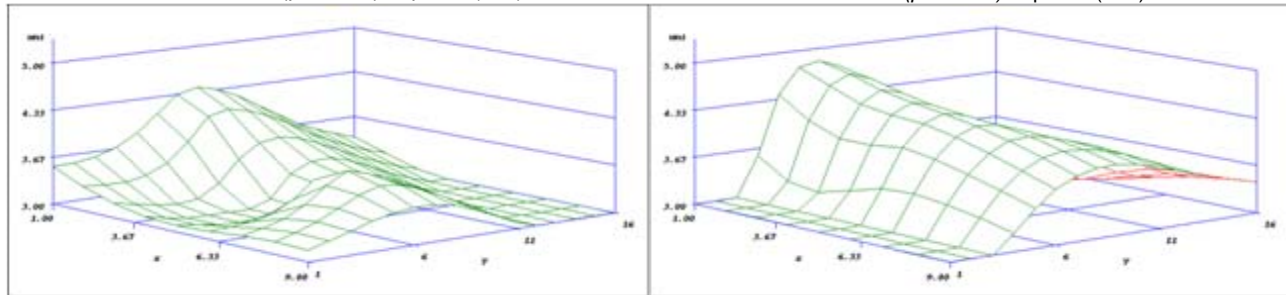

B

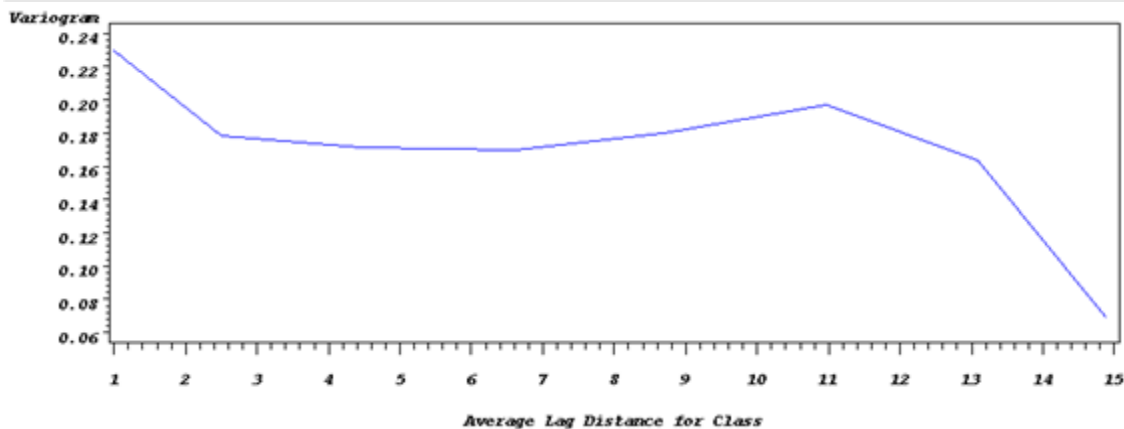

**Supplemental Figure 2:** Spatial variation of meiotic behavior measured for allohaploids isolated from the same plants but positioned at different locations in the greenhouse.

(A) The plots, obtained using Proc G3D (SAS Institute Inc., 1999), represent the shape of the surface obtained for allohaploids isolated from five accessions (with two plants representing *Mohican*) that were grown at the same time in the greenhouse. For each surface plot, the mean number of univalents scored for each allohaploid was plotted as a vertical variable (z) for the position of this allohaploid in the greenhouse, on a grid of columns by rows (y and x, respectively). The response surfaces were different between some accessions (e.g. *Darmor-bzh* compared to *Mohican*) but alike for some others (e.g. the two plants representing *Mohican* and *Drakkar*) and no common trends were apparent.

(B) Plot of the variogram computed using the same dataset as below (Proc Variogram, SAS Institute Inc., 1999). This variogram describes how differences in the number of univalents vary as the distances between the points at which this variable is measured increases (e.g. increasing variation with increasing distances would indicate that “neighbors” are more likely to share a common pattern of variation than plants separated by larger distances). The lag distance (X-axis) is the size of the bins into which the pairwise distances between all of the points of the dataset were grouped (the “neighborhood size”); in this example, the most appropriate lag distance was first determined as 2.2 and a total of seven lags was used (so that reasonable number of pairs were grouped in each bin). Then, for each bin, the variance of the pairwise difference in the number of univalents was calculated and plotted on the Y-axis. As the variogram appears relatively constant across all distances, the number of univalents appears to be free of spatial correlation (when all accessions are considered together).

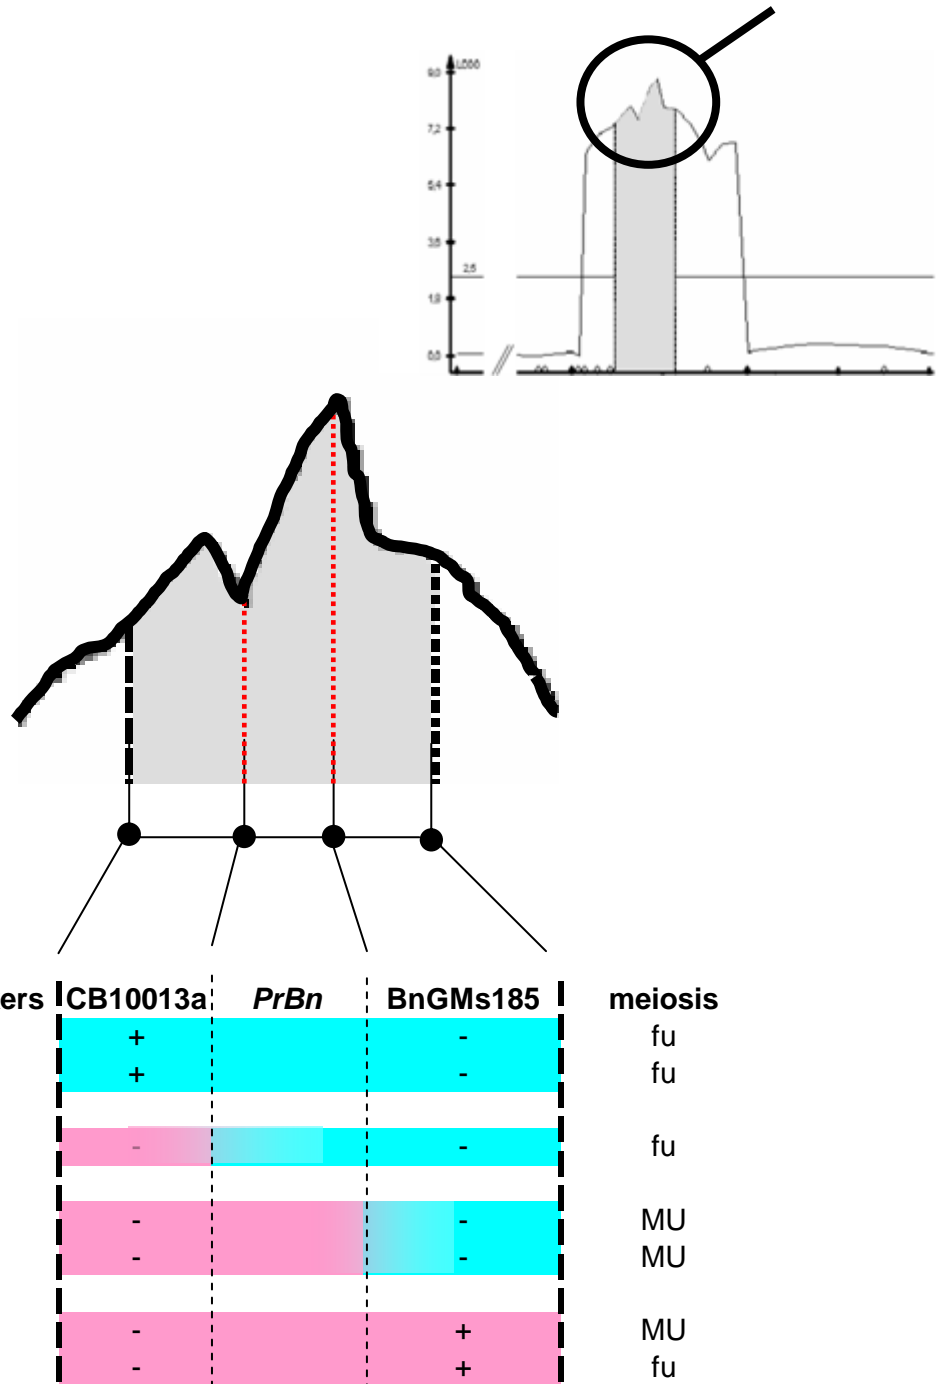

**Supplemental Figure 3:** Hypothetical position of *PrBn* owing to the multilocus genotypes of recombinant varieties at the *PrBn* region.

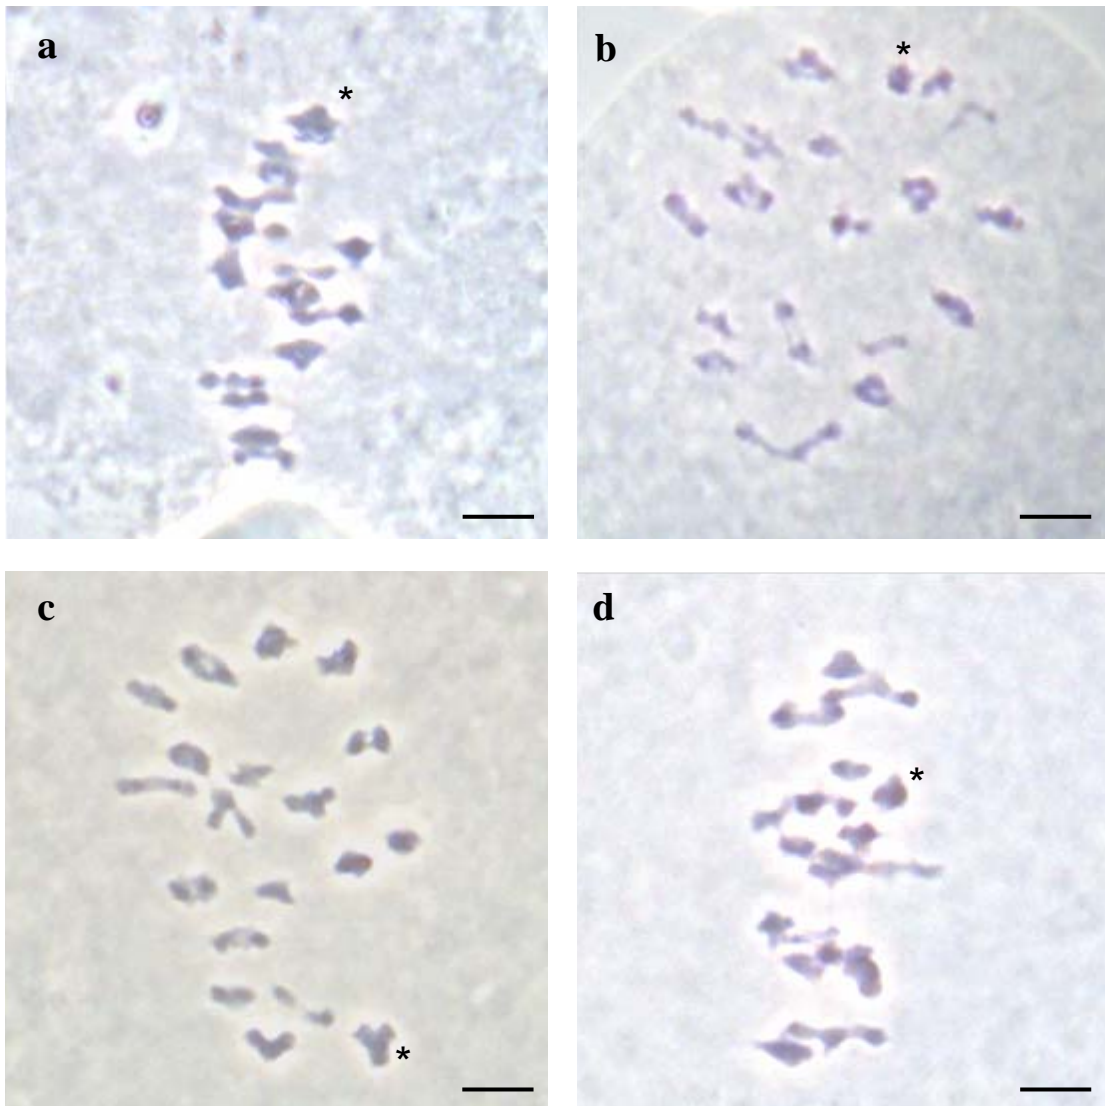

**Supplemental Figure 4:** Representative Metaphase I nuclei of *Brassica napus* allotetraploid accessions showing no difference in chiasma frequency.

(a) *Darmor-bzh* (fu at the haploid stage), (b) *Norin6* (fu at the haploid stage), (c) *Westar* (MU at the haploid stage), (d) *Spok* (MU at the haploid stage).

Chiasmata were recorded according to the criteria established by Sanchez-Moran et al. (2001). Bivalent configurations at metaphase I fell into two categories, rods and rings. Rods were considered to be bound by one single chiasma in one arm only, whereas rings were considered to have both arms bound by one chiasma. With that proviso, mean cell chiasma frequencies and their corresponding standard deviations were estimated (N=20 PMCs) as follows: (a)  $35.45 \pm 0.82$ ; (b)  $35.15 \pm 0.67$ ; (c)  $35.85 \pm 0.74$  and (d)  $35.4 \pm 0.82$ . However these estimates are biased downwardly because it is not possible to detect indisputably the presence of a second chiasma in one arm although they do exist (Nicolas et al., 2009) (see \* for ambiguous bivalents). Bars = 5  $\mu$ m.

**Supplemental References:**

**Nicolas, S.D., Leflon, M., Monod, H., Eber, F., Coriton, O., Huetau, V., Chevre, A.M., and Jenczewski, E.** (2009). Genetic Regulation of Meiotic Cross-Overs between Related Genomes in *Brassica napus* Haploids and Hybrids. *The Plant Cell* **21**, 373-385.

**Sanchez-Moran, E., Armstrong, S.J., Santos, J.L., Franklin, F.C.H., and Jones, G.H.** (2001). Chiasma formation in *Arabidopsis thaliana* accession Wassileskija and in two meiotic mutants. *Chromosome Res.* **9**, 121-128

**SAS Institute** (1999). SAS/STAT User's Guide, Version 8. SAS Institute, Cary, NC.

Supplemental Table 1: Differences of the LS-means between accessions within the MU and fu groups

**fu group**

| variete | variete   | Estimate | Standard Error | DF  | t Value | Pr >  t |
|---------|-----------|----------|----------------|-----|---------|---------|
| Darmor  | Akamar    | 0.8689   | 0.1054         | 226 | 8.24    | <.0001  |
| Darmor  | Brutor    | 0.5993   | 0.1552         | 186 | 3.86    | 0.0002  |
| Darmor  | Capricorn | -0.05811 | 0.1034         | 224 | -0.56   | 0.5747  |
| Darmor  | Drakkar   | 0.00875  | 0.1453         | 237 | 0.06    | 0.9520  |
| Darmor  | JetNeuf   | -1.0900  | 0.1779         | 237 | -6.13   | <.0001  |
| Darmor  | Loras     | -1.3071  | 0.2232         | 239 | -5.86   | <.0001  |
| Darmor  | Maxol     | 0.04628  | 0.1532         | 239 | 0.30    | 0.7628  |
| Darmor  | Mohican   | 0.1816   | 0.08733        | 216 | 2.08    | 0.0387  |
| Darmor  | Nachan    | -0.4099  | 0.1313         | 191 | -3.12   | 0.0021  |
| Darmor  | Norin1    | -0.2513  | 0.1254         | 176 | -2.00   | 0.0467  |
| Darmor  | Norin10   | -0.3233  | 0.1205         | 163 | -2.68   | 0.0081  |
| Darmor  | Norin6    | -0.1621  | 0.1286         | 182 | -1.26   | 0.2091  |
| Darmor  | Oro       | -1.3881  | 0.2220         | 239 | -6.25   | <.0001  |
| Darmor  | Rutab22   | -0.1288  | 0.1629         | 201 | -0.79   | 0.4298  |
| Darmor  | Rutab85   | -0.1220  | 0.1417         | 177 | -0.86   | 0.3902  |
| Darmor  | Stellar   | -0.1087  | 0.1453         | 237 | -0.75   | 0.4550  |
| Darmor  | Taichung  | -1.3933  | 0.1999         | 203 | -6.97   | <.0001  |

**MU group**

| variete  | variete | Estimate | Standard Error | DF   | t Value | Pr >  t |
|----------|---------|----------|----------------|------|---------|---------|
| Garant   | Yudal   | -0.09221 | 0.06853        | 66.6 | -1.35   | 0.1830  |
| Asp Kale | Yudal   | 0.1356   | 0.06009        | 67.4 | 2.26    | 0.0272  |
| Hinchu   | Yudal   | -0.4908  | 0.1312         | 59   | -3.74   | 0.0004  |
| Loras    | Yudal   | -0.2977  | 0.07444        | 67.9 | -4.00   | 0.0002  |
| Norin9   | Yudal   | -0.1222  | 0.1068         | 63.3 | -1.14   | 0.2566  |
| Oro      | Yudal   | -0.2398  | 0.06670        | 67.7 | -3.60   | 0.0006  |
| Petranov | Yudal   | -0.1874  | 0.09940        | 67.3 | -1.89   | 0.0637  |
| Spok     | Yudal   | -0.06979 | 0.07934        | 53.9 | -0.88   | 0.3829  |
| Westar   | Yudal   | 0.1010   | 0.09096        | 55.4 | 1.11    | 0.2717  |

Analyses were performed separately on the fu and MU groups. Least-squares means (LS-means) were computed using the LSMEANS statement of Proc MIXED (SAS Institute Inc., 1999) for the *accession* effect. A multiple comparison adjustment for the *p*-values and confidence limits for the differences of LS-means was applied.
